# Supplementary material for: A Simple and Low-Cost Monitoring System to Investigate Environmental Conditions in a Biological Research Laboratory
Source: PubMed Central journal article supplement (PMC4714841; doi:10.1371/journal.pone.0147140), 2016-01-15
Supplement: pone.0147140.s003.pdf [file pone.0147140.s003.pdf]

| Item                                                                   | Supplier                            | Catalog # | comments                                                                                                                                                                                                                                                                                                                                                        |
|------------------------------------------------------------------------|-------------------------------------|-----------|-----------------------------------------------------------------------------------------------------------------------------------------------------------------------------------------------------------------------------------------------------------------------------------------------------------------------------------------------------------------|
| Raspberry Pi 2 Model B                                                 | Newark element 14 (and many others) | 38Y6469   | required                                                                                                                                                                                                                                                                                                                                                        |
| Power supply, 5V 2A                                                    |                                     | 68X2071   | required - several alternatives exist, however as the Phidgets draw power through the RPi, we recommend at least a 2A capacity, as we have experienced erratic behaviour with 1A power supplies                                                                                                                                                                 |
| Case for RPi                                                           |                                     | 68X2068   | optional, recommended to protect the RPi from damage                                                                                                                                                                                                                                                                                                            |
| Patriot Fuel 9000mAh Tablet and Smartphone Mobile Rechargeable Battery | Amazon.ca                           | PCPB90002 | optional, can be connected between the power supply and the RPi if power interruptions are a concern                                                                                                                                                                                                                                                            |
| PhidgetInterfaceKit 8/8/8                                              | Phidgets.com                        | 1018_2    | required in order to connect 1124 temperature sensors, 1140 / 1141 pressure sensors and digital inputs                                                                                                                                                                                                                                                          |
| Precision temperature sensor                                           |                                     | 1124_0    | optional, can connect up to 8 of these to the InterfaceKit, rated for temperatures of -30°C to +80°C                                                                                                                                                                                                                                                            |
| Absolute Air Pressure Sensor 20-400 kPa                                |                                     | 1140_0    | optional, can connect up to 8 of these to the InterfaceKit, rated for pressures of 20 kPa to 400 kPa                                                                                                                                                                                                                                                            |
| Absolute Air Pressure Sensor 15-115 kPa                                |                                     | 1141_0    | optional, can connect up to 8 of these to the InterfaceKit, rated for pressures of 15 kPa to 115 kPa                                                                                                                                                                                                                                                            |
| Sensor Cable 350cm                                                     |                                     | 3004_0    | optional, for extending the reach of the temperature and pressure sensors                                                                                                                                                                                                                                                                                       |
| Magnetic Contact Switch BR-1014                                        |                                     | 3560_0    | optional, can connect up to 8 of these to the InterfaceKit digital inputs                                                                                                                                                                                                                                                                                       |
| PhidgetTemperatureSensor 4-Input                                       |                                     | 1048_0    | required in order to connect 3107_0 Type K thermocouple                                                                                                                                                                                                                                                                                                         |
| TPK-01 Bead Probe K-Type Thermocouple                                  |                                     | 3107_0    | optional, can connect up to 4 of these to the PhidgetTemperatureSensor rated for temperatures of -50°C to +200°C. From our communications with technical support, the lower temperature limit is based on concerns of cracking the insulation if moved, but in a static situation where the probe will not be moved, it is suitable for much lower temperatures |
| K-Type Thermocouple Extension Wire                                     |                                     | 3112_0    | optional, for extending the reach of the thermocouple probes                                                                                                                                                                                                                                                                                                    |
